# Supplementary material
Source: MDPI journal article supplement (https://www.mdpi.com/1999-4907/9/11/661)
Supplement: s1 [file s1]

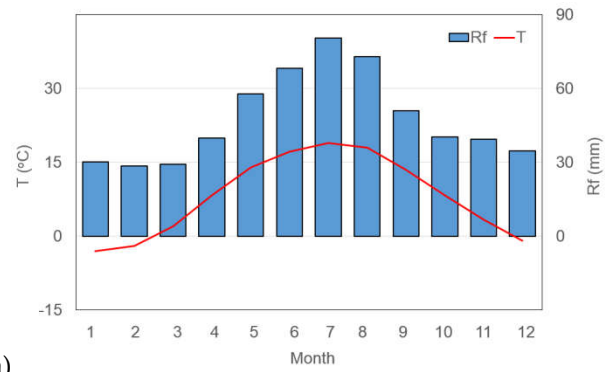

(a)

| Month                      | Jan  | Feb | Mar  | Apr  | May | Jun | Jul  | Aug  | Sep | Oct | Nov | Dec |
|----------------------------|------|-----|------|------|-----|-----|------|------|-----|-----|-----|-----|
| Element                    | Jan  | Feb | Mar  | Apr  | May | Jun | Jul  | Aug  | Sep | Oct | Nov | Dec |
| Highest T / 10 years (°C)  | 0.34 |     | 0.27 | 0.19 |     |     | 0.14 | 0.14 |     |     |     |     |
| Highest Rf / 10 years (mm) | 1.48 |     | 1.70 |      |     |     |      |      |     |     |     |     |

(b)

**Figure S1.** Climograph (a), as well as the significant, at least  $\alpha \leq 0.05$ , trend (b) of the average air temperature (T) and total precipitation (Rf) for the Puławy station 1930–2015.

**Table S1.** Similarity assessment matrix of raw and residual site chronologies of Scots pine (PSO) by means of indicators—GLK (%) and *t*-value (given in brackets) 1930–2015.

|         | Chronology          |                     |                    |                    |                 |                    |                    |                    |                    |                 |
|---------|---------------------|---------------------|--------------------|--------------------|-----------------|--------------------|--------------------|--------------------|--------------------|-----------------|
|         | Raw (mm)            |                     |                    |                    |                 | Residual           |                    |                    |                    |                 |
|         | PSO85a              | PSO109a             | PSO116c            | PSO142d            | PSO176f         | PSO85a             | PSO109a            | PSO116c            | PSO142d            | PSO176f         |
| PSO85a  | -                   | 64 <sup>1</sup>     | 65 <sup>1</sup>    | 64 <sup>1</sup>    | 63 <sup>1</sup> | -                  | 68 <sup>1</sup>    | 70 <sup>1</sup>    | 65 <sup>1</sup>    | 61 <sup>2</sup> |
| PSO109a | (8.3) <sup>1</sup>  | -                   | 68 <sup>1</sup>    | 65 <sup>1</sup>    | 66 <sup>1</sup> | (8.3) <sup>1</sup> | -                  | 62 <sup>2</sup>    | 61 <sup>2</sup>    | 61 <sup>2</sup> |
| PSO116c | (12.2) <sup>1</sup> | (10.3) <sup>1</sup> | -                  | 77 <sup>1</sup>    | 74 <sup>1</sup> | (6.6) <sup>1</sup> | (6.7) <sup>1</sup> | -                  | 86 <sup>1</sup>    | 84 <sup>1</sup> |
| PSO142d | (9.2) <sup>1</sup>  | (10.8) <sup>1</sup> | (8.4) <sup>1</sup> | -                  | 68 <sup>1</sup> | (5.4) <sup>1</sup> | (6.1) <sup>1</sup> | (8.5) <sup>1</sup> | -                  | 77 <sup>1</sup> |
| PSO176f | (3.9) <sup>1</sup>  | (6.4) <sup>1</sup>  | (8.8) <sup>1</sup> | (6.2) <sup>1</sup> | -               | (3.1) <sup>1</sup> | (4.5) <sup>1</sup> | (7.1) <sup>1</sup> | (5.5) <sup>1</sup> | -               |

Notes: <sup>1</sup> significant at  $\alpha \leq 0.01$ , <sup>2</sup> significant at  $\alpha \leq 0.05$ , 176f reference plot.
